# Supplementary material for: Process characterization of epithelial–mesenchymal transition in alveolar epithelial type II cells using surface-enhanced Raman scattering spectroscopy
Source: Royal Society of Chemistry journal article supplement (doi:10.1039/c5ra17022b), 2016-01-01
Supplement: c5ra17022b1.pdf [file c5ra17022b1.pdf]

## Supporting Information

### **Process characterization of epithelial-mesenchymal transition in alveolar epithelial type II cells using surface-enhanced Raman scattering spectroscopy**

Xiaowei Cao<sup>a,1</sup>, Xiang Chen<sup>b,1</sup>, Mingyue Zhang<sup>a</sup>, Wenbo Lu<sup>a</sup>, Chaowen Shi<sup>b</sup>, Li Li<sup>a</sup>,

Jian Dong<sup>a</sup>, Xiaodong Han<sup>b</sup>, Weiping Qian<sup>a,\*</sup>

*<sup>a</sup>State Key Laboratory of Bioelectronics, School of Biological Science and Medical Engineering, Southeast University, Nanjing 210096, China*

*<sup>b</sup>Jiangsu Key Laboratory of Molecular Medicine, Medical School of Nanjing University, Nanjing 210093, China*

*\*Corresponding author: Tel: (+86)25-83795719; Fax: (+86)25-83795719. E-mail:*

*wqian@seu.edu.cn*

*<sup>1</sup>Contributed equally*

## **S1. Materials and methods**

### **1.1 Materials**

Chloroauric acid tetrahydrate ( $\text{HAuCl}_4 \cdot 4\text{H}_2\text{O}$ ), trisodium citrate ( $\text{C}_6\text{H}_5\text{Na}_3\text{O}_7 \cdot 2\text{H}_2\text{O}$ ) and hydroquinone were all purchased from Sunshine Biotechnology Ltd. (Nanjing, China). The cell culture media and supplements were purchased from Alfa Aesar (USA). N-hydroxysuccinimide (NHS) and 1-ethyl-3-[3-dimethylaminopropyl] carbodiimide hydrochloride (EDC) were purchased from Sangon Biotech Co. Ltd. (China). HS-PEG-COOH (molecular weight 3 kDa) was purchased from ToYong Biotechnology Ltd. (Shanghai, China). The cell counting kit (CCK-8) purchased from Sigma-Aldrich, was stored at 4 °C. TAT-peptides were ordered from GL Biochem Ltd. (Shanghai, China). All glassware was cleaned with aqua regia and then rinsed thoroughly with deionized water. Water used in the experiments was ultrapure deionized water (resistance,  $18 \text{ M}\Omega \text{ cm}^{-1}$ ).

### **1.2 Synthesis of AuNSs**

AuNSs were synthesized through a seed-mediated growth approach. Gold seeds were prepared through a modified turkevich method. 300  $\mu\text{L}$   $\text{HAuCl}_4$  (100 mM) solution was put into a flask with 30 mL of deionized water under vigorous stirring and heated to boil. As soon as the solution was boiling, 900  $\mu\text{L}$  of 1% sodium citrate aqueous solution was added and kept at boiling until the solution became wine red in color. The solution was then cooled under stirring to obtain gold seeds. The seeds were used within 1 day after preparation.

For a typical synthesis of AuNSs, 25  $\mu\text{L}$  of  $\text{HAuCl}_4$  (100 mM) was added into 10

mL of deionized water under vigorous stirring, next 50  $\mu$ L of gold seeds, 22  $\mu$ L of 1 % sodium citrate and 1 mL of hydroquinone (30 mM) were added into the reaction system one by one. The solution was kept under stirring at room temperature for 30 minutes to obtain AuNSs.

### **1.3 Preparation of SERS probes**

SH-PEG-COOH was used as the capping materials in the process of preparation of SERS probes. It could couple to the AuNSs by the chemical bonds sulfhydryl group (-SH), meanwhile SH-PEG-COOH also played the role of conjugation agent in connecting AuNSs with TAT molecules. EDC and NHS acted as the role of coupling agents, the carboxy group (-COOH) of PEG would be activated by adding EDC and NHS into the colloid solution, the TAT molecules could be conjugated to the surface of PEG-stabilized AuNSs. Firstly, 100  $\mu$ L of HS-PEG-COOH (10 mM) solution was added to 10 mL of freshly synthesized AuNSs solution and gentle stirring for 1 h at room temperature. Then, 10  $\mu$ L of 100 mM EDC and 15  $\mu$ L of 100 mM NHS were added into the PEG-stabilized AuNSs solution and allowed to react for 1 h. Finally, 50  $\mu$ L of TAT molecules were mixed and stirred for another 4 h. The excess reagents were removed by centrifugation three times at 7000 rpm for 10 min. In our experiment, SERS probe preparation mainly refer to the previous reports.<sup>1,2</sup>

### **1.4 Cell lines and culture**

The alveolar epithelial type II (ATII cells) was obtained from Yili Bio-technology Co. Ltd. (Shanghai, China). The 3T3-NIH cell line was purchased from American Type Culture Collection. Both cells were cultured in high-glucose Dulbecco's Modified

Eagle Medium (DMEM) containing 10% FBS and maintained in a humidified atmosphere of 5% CO<sub>2</sub>/95% air at 37 °C. All of the cells were passaged 1:2 or 1:3 using 0.25% trypsin when they reached 70-90 % confluence. To induce differentiation of ATII cells into fibroblasts, ATII cells were incubated with BLM (25 μM) and as-prepared SERS probes. After 7 and 14 days, the medium was removed and cells were harvested for SERS analysis.

### **1.5 CCK-8 viability assays**

CCK-8 was used to investigate the biological effect of TAT-functionalized AuNSs on the viability of the ATII cells in terms of cell viability,  $1.0 \times 10^5$  cells were seeded into each well of a 96-well plate. After cell adhesion is verified, cells were incubated with various concentrations of SERS probes (0, 0.5, 2.5, 5.0, 12.5, 25 μg/mL) for 24 h. Then, the 10 μL CCK8 solution was added to 90 μL of culture medium. The cells were subsequently incubated for 24 h at 37 °C and the attenuation was measured at 450 nm.

### **1.6 Immunofluorescent staining and western blot assay**

The immunofluorescence analysis was performed as described.<sup>3</sup> The following primary antibodies were employed: Rabbit anti-Ecadherin and rabbit anti- $\alpha$ -smooth muscle actin (SMA) (all from Abcam Inc. Cambridge, MA). Alexa Fluor 594 or 488-conjugated goat anti-rabbit IgG (Invitrogen) was used as the secondary antibody. Nuclei were stained with 1 μg/mL DAPI (Sigma).

For Western blotting analysis, the whole cell lysates (20 μg protein) were separated using SDS/10% PAGE and electrophoretically transferred to a PVDF

membrane (Roche) by standard procedures. After the membranes had been blocked, primary antibodies were added to the membranes followed by incubation at 4 °C for 12 h. After three washes in PBST, the membranes were incubated with the secondary antibody at 37 °C for 1 h. The primary antibodies employed were: rabbit anti-E-cadherin (ab40772), rabbit anti- $\alpha$ -smooth muscle actin (SMA) (ab5694), rabbit anti-vimentin (ab92547), mouse-anti-CK-18 (ab668), rabbit-anti-collagen (ab34710) and mouse anti- $\beta$ -actin (ab8226). Horseradish peroxidase-conjugated goat anti-rabbit/mouse IgG (BA1051 and BA1055, Boster, Wuhan, China) was used as the secondary antibody. The dilution concentration was used as recommended. Immunoreactive protein bands were detected using an Odyssey Scanning System (LI-COR, Inc., Lincoln, NE).

### **1.7 Characterization**

The morphology of the as-prepared AuNSs was characterized with a Zeiss ULTRA-plus scanning electron microscope (SEM) and a Philips TECNAI 10 transmission electron microscope (TEM). UV-vis absorption spectra of samples were obtained with a Shimadzu UV3600 UV-Vis-NIR spectrum-photometer. Fourier Transform Infrared spectroscopy (FT-IR) measurements were made on a FT-IR Spectrometer TENSOR 27. The LSPR scattering spectra of nanoparticles were measured using a micro spectrometer with a grating. The TEM observation of AuNSs inside cells were performed by a JEM-2100HR transmission electron microscopy. The fluorescent images were captured using a confocal fluorescence microscope. Raman measurements were performed with a 785 nm laser and the laser power was adjust to

5 mW. The corresponding laser was focused onto the sample using a 50× long working distance objective. SERS spectra were collected in static mode and acquisition time was 10 seconds over a wavenumber range of 600-1700  $\text{cm}^{-1}$  for cells. In order to obtain spatial-averaged SERS spectral information of individual cell, the laser spot was scanned across nearly the whole cell during SERS acquisition. The measured SERS spectra of 20 cells were used to obtain an average SERS spectrum for each cell.

### **1.8 Statistical analysis**

The data were shown as means  $\pm$  SD. Statistical analyses were carried out using the SPSS software for windows version 11.0 (SPSS Inc, Chicago, IL, USA). Values at \*\*  $P < 0.05$  were considered as statistically significant.

## **S2. Results and discussion**

### **2.1 Characterization of SERS probes**

Fig. S1A showed the UV-vis absorption spectra of synthetic progress of SERS probes. The spectrum of the AuNSs showed a maximum absorption at 645 nm due to surface plasmon resonance. The spectrum of AuNSs and PEG-stabilized AuNSs looked almost identical. After being conjugated the TAT molecules, which absorbed on the surfaces of PEG-stabilized AuNSs through stable amide bonds, the intensity of maximum absorption peak reduced a little and the absorption peak had a red shift of  $\sim 11$  nm. We recorded the FT-IR spectra of AuNSs as well as its conjugated forms (Fig. S1B). The broadened peak at 3200-3400  $\text{cm}^{-1}$  was attributed to the presence of -

OH groups on the surface of PEG-stabilized AuNSs.<sup>4,5</sup> The two prominent and sharp peaks at about 1649  $\text{cm}^{-1}$  and 1553  $\text{cm}^{-1}$ , assigned to the C=O stretching (amide I) and the asymmetric stretching mode in the CO-NH of TAT-functionalized AuNSs.<sup>6,7</sup> Furthermore, the SERS spectra were measured to identify the functional groups of samples (Fig. S1C). The appearance of characteristic bands at 1553  $\text{cm}^{-1}$  could be ascribed to amide II bands of TAT-functionalized AuNSs.<sup>8</sup> It suggested that the TAT molecules were successfully conjugated to the surface of AuNSs. Fig. S1D showed the LSPR scattering spectra of AuNSs, PEG-stabilized AuNSs and TAT-functionalized AuNSs. Compared with the scattering spectrum of AuNSs, the scattering peak ( $\lambda_{\text{max}}$ ) had a red-shift to longer wavelengths after being conjugated with TAT molecules. The TAT conjugation process may lead to spectral red-shift due to the increase of refractive index (RI) on the plasmonic structure surface.<sup>9</sup>

## 2.2 Stability measurements

Since TAT-functionalized AuNSs were to be exploited as intracellular SERS probes, they should retain optical properties in the physiological medium. The stability of SERS probes was checked via a reliable aggregation test. This was done by mixed with different concentrations of NaCl solution.<sup>10</sup> Fig. S2B and S2C showed the UV-vis spectra of PEG-stabilized AuNSs and TAT-functionalized AuNSs from the aggregation test. No significant changes in the spectral shape and the maximum absorption peak were observed, which meant that the SH-PEG-COOH anchored on the AuNSs surfaces, providing effective stabilization against aggregation.<sup>11</sup> The UV-vis absorption spectra of the AuNSs reduced greatly (Fig. S2A), and it suggested that

there were little partial aggregation of AuNSs. We further tested the stability of the AuNSs, PEG-stabilized AuNSs and TAT-functionalized AuNSs when placing them in PBS solution (pH=7.4) for several days at room temperature. It was found that the UV-vis spectra of PEG-stabilized AuNSs (Fig. S2E) and TAT-functionalized AuNSs (Fig. S2F) displayed few changes after five days. These results confirmed that the TAT-functionalized SERS probes were reliable for applications in physiological media.

## References

1. X. M. Qian, X. H. Peng, D. O. Ansari, Q. Q. Yin-Goen, G. Z. Chen, D. M. Shin, L. L. Yang, A. N. Young, M. D. Wang and S. M. Nie, *Nat. biotechnol.*, 2008, **6**, 83-90.
2. H. K. Yuan, A. M. Fales and T. Vo-Dinh, *J. Am. Chem. Soc.*, 2012, **134**, 11358-11361.
3. X. Gong, Z. Sun, D. Cui, X. Xu, H. Zhu and L. Wang, *Cell Biol. Int.*, 2014, **38**, 405-411.
4. M. S. Lee and J. C. Kim, *Polym. Eng. Sci.*, 2014, **54**, 227-233.
5. F. Audouin and A. Heise, *Polymer*, 2014, **55**, 403-409.
6. A. Okamura, M. Itayagoshi, T. Hagiwara, M. Yamaguchi, T. Kanamori, T. Shinbo and P. C. Wang, *Biomaterials*, 2004, **26**, 1287-1292.
7. G. Arya, M. Vandana, S. Acharya and S. K.Sahoo, *Nanomed. Nanotechnol.*, 2011, **7**, 859-870.

8. S Doinita, F. A. Sandra, E. V. Constantinos and J. T. J. George, *Protein Sci.*, 2003, **12**, 861-870.
9. L. Zhang, Y. Zhang, Y. L. Hu, Q. L. Fan, W. J. Yang, A. R. Li, S. Z. Li, W. Huang and L. H. Wang, *Chem. Commun.*, 2015, **51**, 294-297.
10. C. Mangeney, F. Ferrage, I. Aujard, V. Marchi-Artzner, L. Jullien, O. Ouari, R. El Djouhar, A. Laschewsky, I. Vikholm and J. W. Sadowski, *J. Am. Chem. Soc.*, 2002, **124**, 5811-5821.
11. W. P. Wuelfing, S. M. Gross, D. T. Miles and R. W. Murray, *J. Am. Chem. Soc.*, 1998, **120**, 12696-12705.

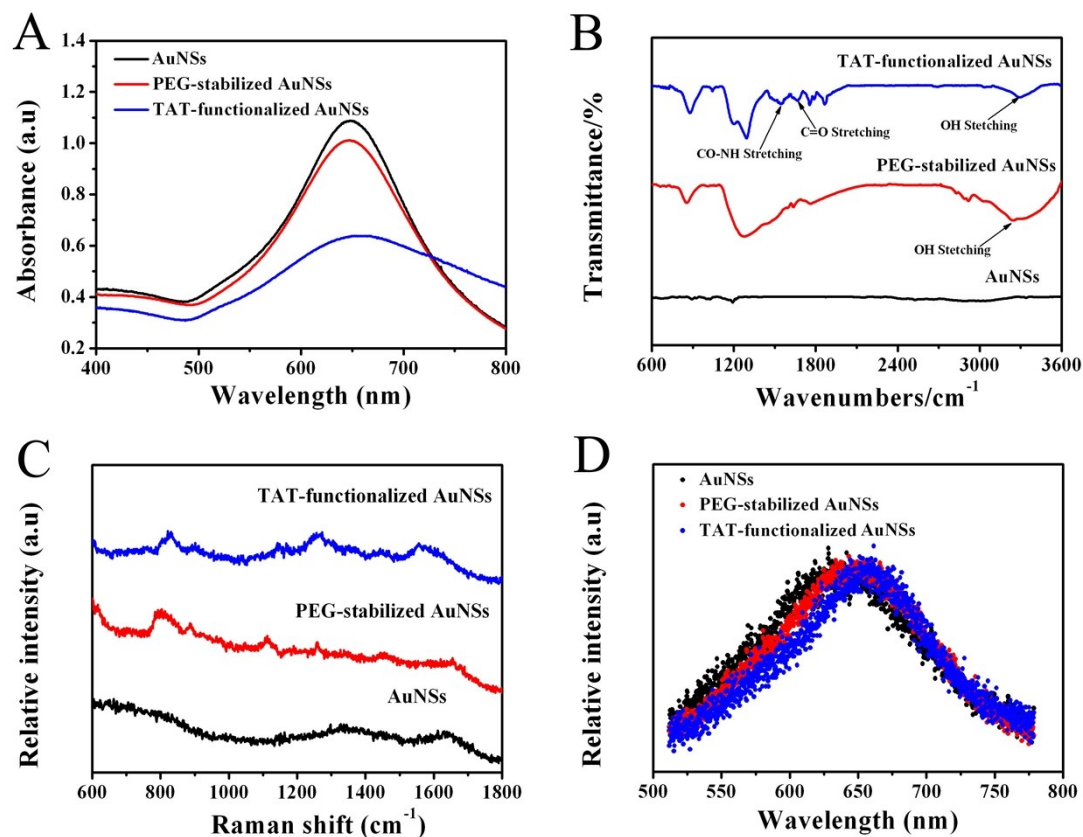

**Fig. S1** (A) UV-vis absorption spectra of AuNSs (black curve), PEG-stabilized AuNSs (red curve), and TAT-functionalized AuNSs (blue curve). (B) The FT-IR spectra of AuNSs (black curve), PEG-stabilized AuNSs (red curve), and TAT-functionalized AuNSs (blue curve). (C) SERS spectra obtained from AuNSs (black curve), PEG-stabilized AuNSs (red curve), and TAT-functionalized AuNSs (blue curve). (D) The LSPR scattering spectra of AuNSs (black curve), PEG-stabilized AuNSs (red curve), and TAT-functionalized AuNSs (blue curve) under dark-field microscopy.

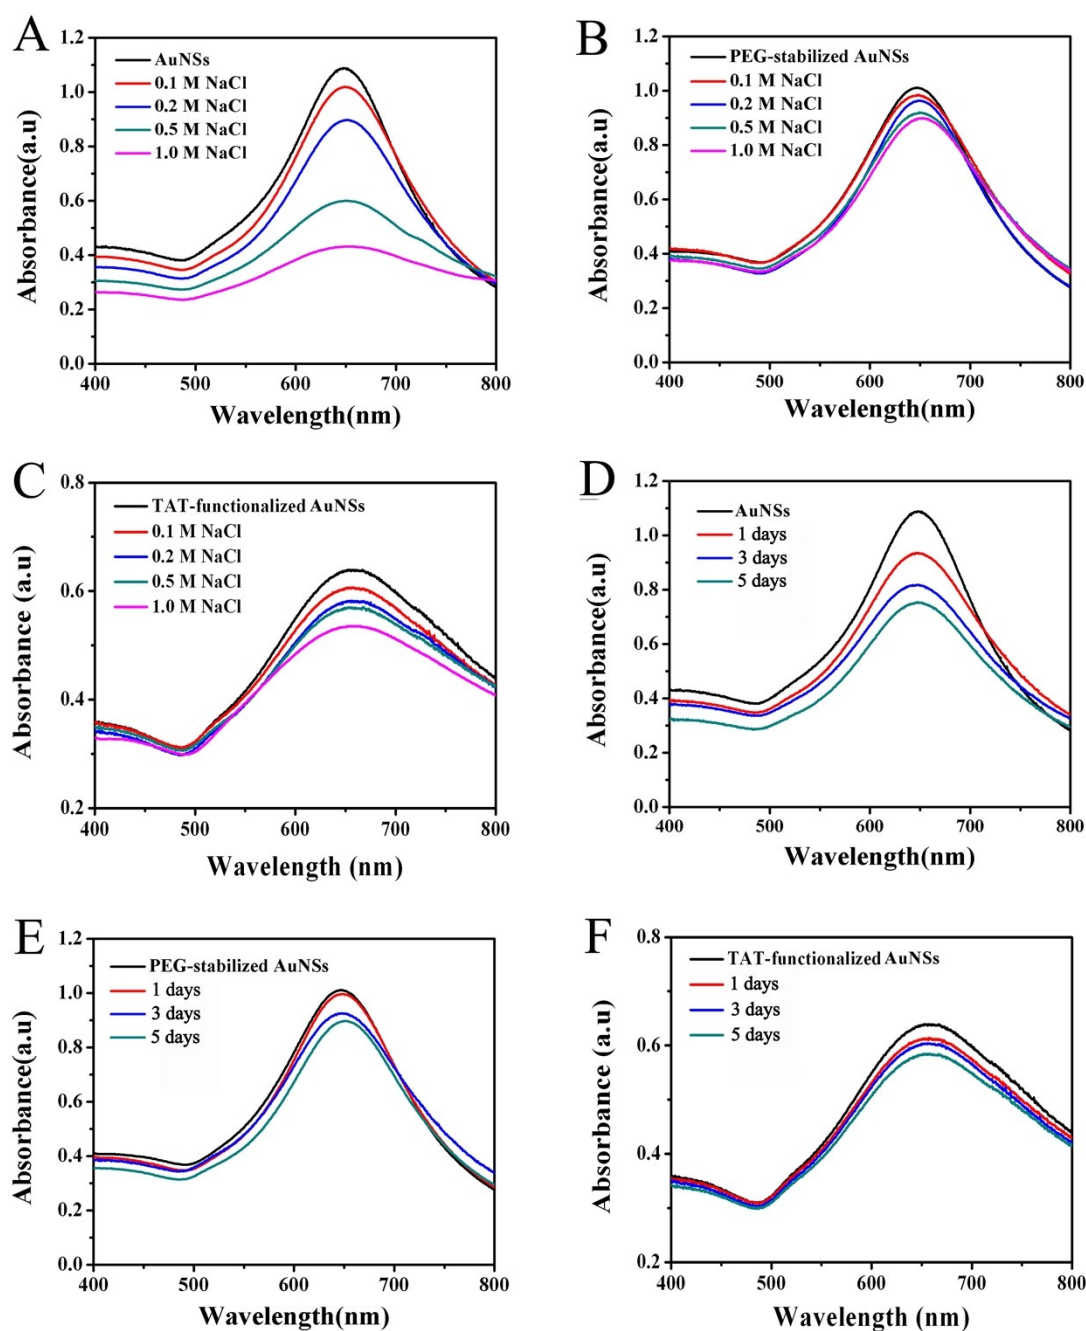

**Fig. S2** Stability analysis of SERS probes. UV-vis absorption spectra of (A) AuNSs, (B) BSA-stabilized AuNSs and (C) TAT-functionalized AuNSs after mixing with different concentrations of NaCl, respectively. UV-vis spectra were recorded of (D) AuNSs, (E) BSA-stabilized AuNSs and (F) TAT-functionalized AuNSs after mixing with PBS and for periods of several days of storage at room temperature, respectively.

Table 1 Raman band assignments

| Raman shift (cm <sup>-1</sup> ) | Band assignment                                                                   |
|---------------------------------|-----------------------------------------------------------------------------------|
| 624                             | C–C twisting mode of phenylalanine                                                |
| 652                             | C–C twisting mode of tyrosine                                                     |
| 674                             | C–S stretching mode of cytosine                                                   |
| 720                             | C-S (protein), A (ring breathing mode of DNA/RNA bases)                           |
| 756                             | symmetric breathing of tryptophan                                                 |
| 786                             | DNA and phosphodiester bands DNA                                                  |
| 818                             | PO <sub>2</sub> <sup>-</sup> stretch nucleic acids                                |
| 852                             | tyrosine                                                                          |
| 867                             | ribose vibration, one of the distinct RNA modes                                   |
| 874                             | hydroxyproline, tryptophan                                                        |
| 923                             | glycogen and lactic acid                                                          |
| 941                             | skeletal modes (polysaccharides, amylopectin)                                     |
| 1006                            | phenylalanine                                                                     |
| 1017                            | symmetric ring breathing of phenylalanine                                         |
| 1033                            | CH <sub>2</sub> CH <sub>3</sub> bending modes of phospholipids                    |
| 1066                            | proline                                                                           |
| 1095                            | lipid, phosphodioxy group (PO <sub>2</sub> <sup>-</sup> in nucleic acids)         |
| 1128                            | C–N stretching (proteins), C–O stretching (carbohydrates)                         |
| 1171                            | (CH) phenylalanine, tyrosine                                                      |
| 1222                            | amide III (β sheet structure), T,A (DNA/RNA)                                      |
| 1249                            | amide III                                                                         |
| 1279                            | amide III (α-helix), triglycerides (fatty acids)                                  |
| 1296                            | CH <sub>2</sub> deformation (protein assignment)                                  |
| 1306                            | C–N stretching aromatic amines                                                    |
| 1336                            | δ (CH <sub>3</sub> ) δ (CH <sub>2</sub> ) twisting, collagen (protein assignment) |
| 1363                            | tryptophan                                                                        |
| 1395                            | C=O symmetric stretch, CH <sub>2</sub> deformation                                |
| 1420                            | CH <sub>2</sub> scissoring vibration (lipid band)                                 |
| 1438                            | CH <sub>2</sub> scissoring                                                        |
| 1449                            | C=N stretching                                                                    |
| 1462                            | δCH <sub>2</sub> , Disaccharides, sucrose                                         |
| 1491                            | C–H bending in amino radical cations                                              |
| 1523                            | C=C carotenoid                                                                    |
| 1544                            | amide II                                                                          |
| 1553                            | amide II                                                                          |
| 1586                            | C=C olefinic stretch                                                              |
| 1608                            | tyrosine, phenylalanine ring vibration                                            |
| 1617                            | C=C bending in phenylalanine and tyrosine                                         |
| 1646                            | amide I, α-helix in protein                                                       |
| 1659                            | amide I band (protein band)                                                       |
| 1683                            | ν (C=O) of phospholipids                                                          |
